# Supplementary material for: Quantitative features of osteo-bioactive Ti surfaces at the atomic/molecular level
Source: Royal Society of Chemistry journal article supplement (doi:10.1039/d4tb02195a), 2024-11-26
Supplement: d4tb02195a1.pdf [file d4tb02195a1.pdf]

## *Supporting Information*

### **Quantitative Features of Osteo-Bioactive Ti Surfaces at the Atomic/Molecular Level**

Fengxiong Luo<sup>a,#</sup>, Dongxuan Li<sup>a,#</sup>, Yu Yang<sup>a</sup>, Jiajun Liu<sup>a</sup>, Ruiqi Mao<sup>c</sup>, Yawen Huang<sup>a</sup>, Jian Lu<sup>a,b,d</sup>,  
Xiangdong Zhu<sup>a,b,d</sup>, Kefeng Wang<sup>a,b,d,\*</sup>, Yujiang Fan<sup>a,b</sup>, and Xingdong Zhang<sup>a,b</sup>

<sup>a</sup> National Engineering Research Center for Biomaterials, Sichuan University,  
Chengdu 610064, China

<sup>b</sup> Research Center for Material Genome Engineering, Sichuan University,  
Chengdu 610064, China

<sup>c</sup> College of Materials Science and Engineering, Sichuan University,  
Chengdu 610064, China

<sup>d</sup> Provincial Engineering Research Center for Biomaterials Genome of Sichuan,  
Sichuan University, Chengdu 610064, China

<sup>e</sup> Key Laboratory of Mechanism Theory and Equipment Design of Ministry of Education, School  
of Mechanical Engineering, Tianjin University, Tianjin 300354, China

\*Corresponding author: KF Wang, [fencal@scu.edu.cn](mailto:fencal@scu.edu.cn),

## **SI-1 Calculation Setup.**

Molecular dynamics calculations were performed using NAMD 2.10 code [1]. For all systems, periodic boundary conditions were imposed, and a TIP3P water model was utilized. A cutoff distance of 12 Å was established for both real-space electrostatic and van der Waals interactions. Long-range electrostatic interactions were characterized using the Particle–Mesh–Ewald method. During the calculations, a time step of 1 fs was chosen, and the rigid bond model was applied to hydrogen atoms via the SHAKE algorithm. The behavior of TIP3P water molecules and ions was described by the CHARMM36 force field. TiO<sub>2</sub> was simulated using parameters that we specifically tailored. The theoretical foundation for this fitting was based on the first-principles calculation results obtained by Matsui et al [2]. The force-field parameters for the functional group were developed using the Force Field Toolkit (ffTK) plugin within the VMD package. The atomic charges of hydroxyl and phosphate were defined in accordance with a comparable structure within the CHARMM36 force field.

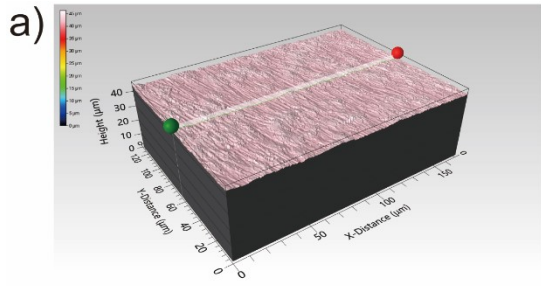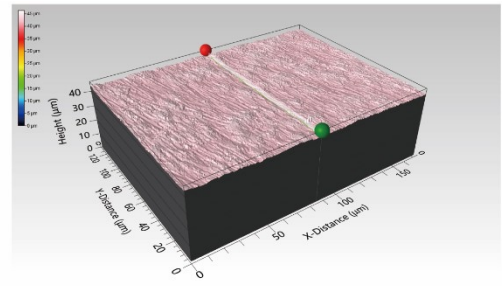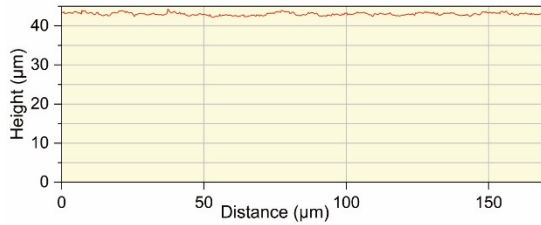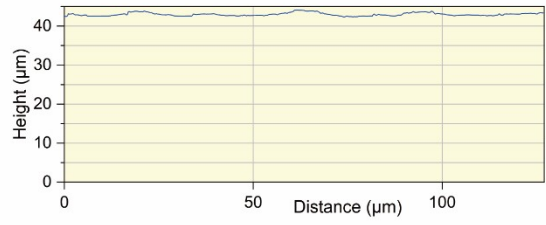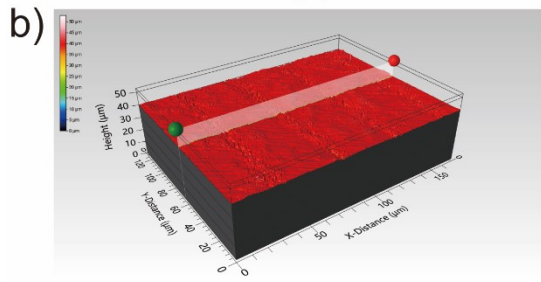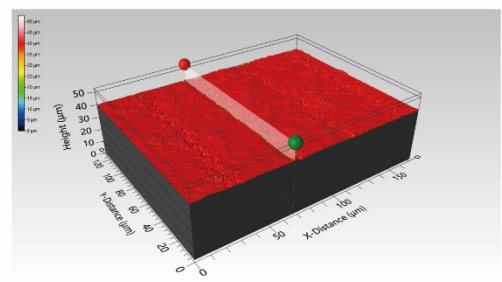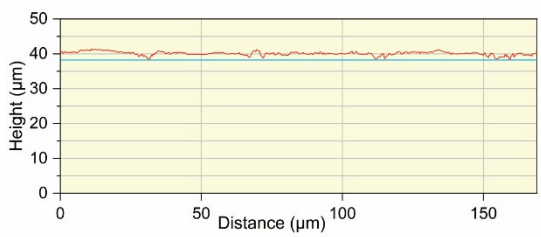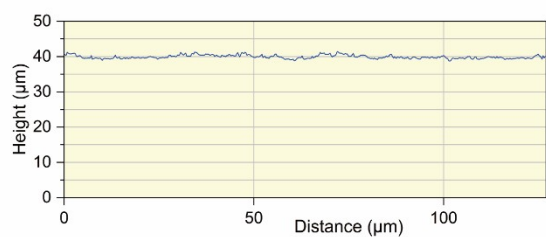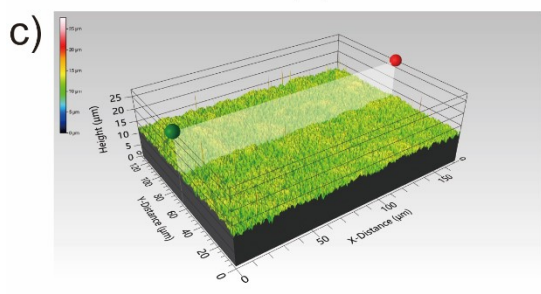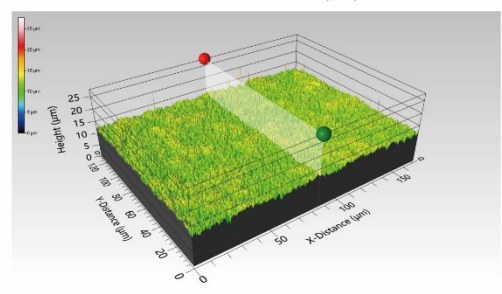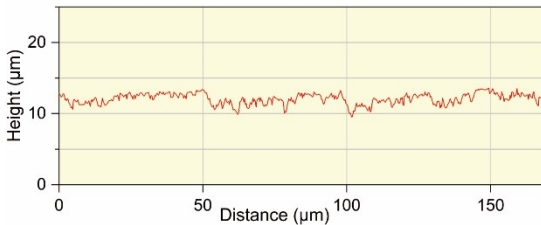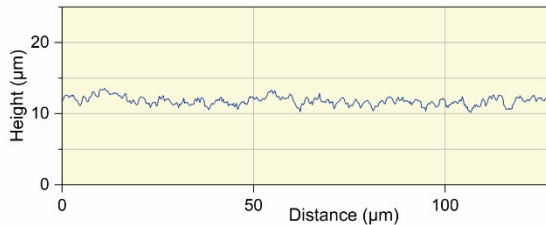

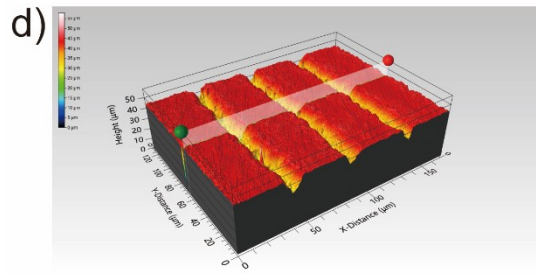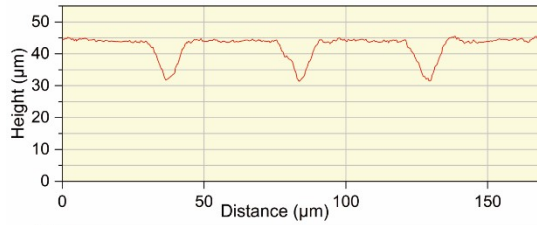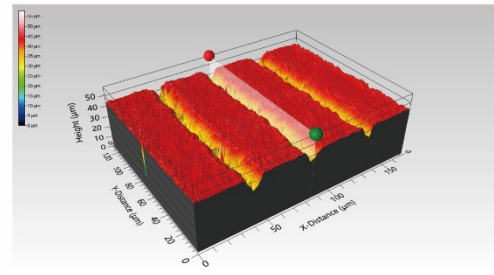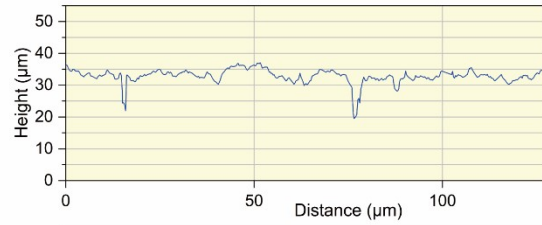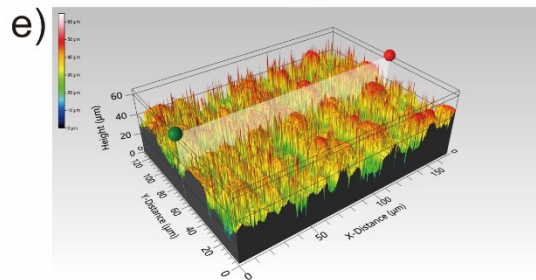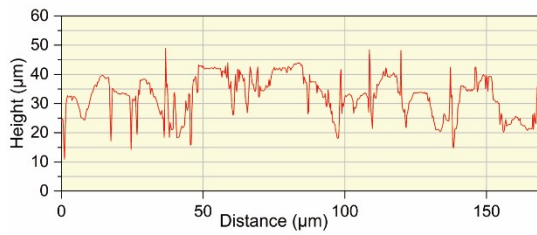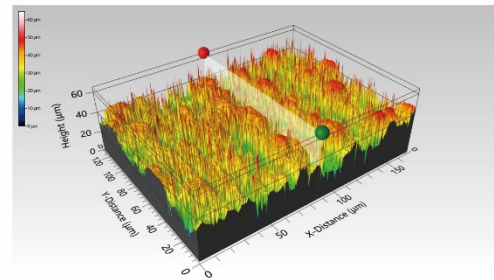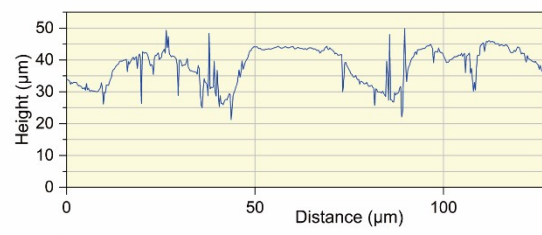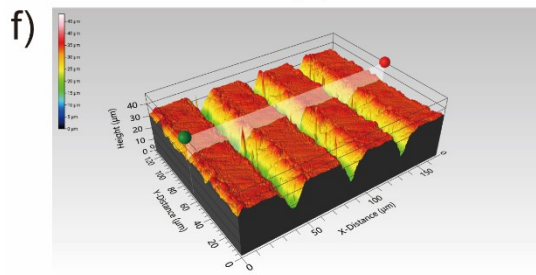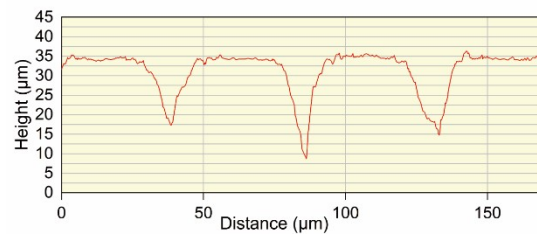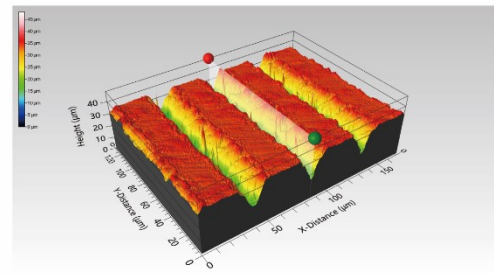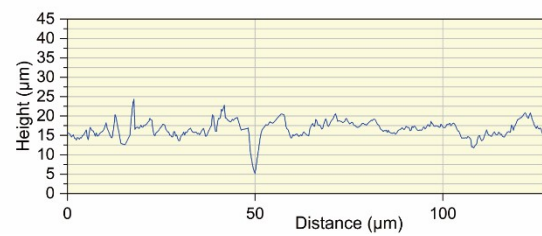

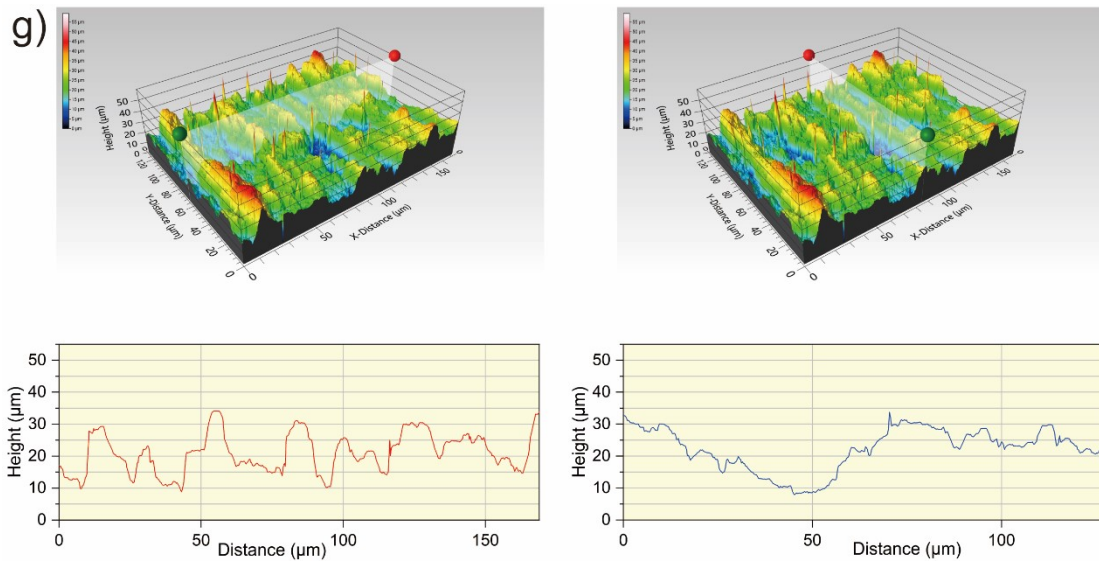

**Figure S1** Three-dimensional (3D) surface profiles and sample ridge shape profiles in detail. a) Ti, b) 0.1W-0.065, c) 0.1W-0.01, d) 0.3W-0.065, e) 0.3W-0.01, f) 0.5W-0.065, g) 0.5W-0.01.

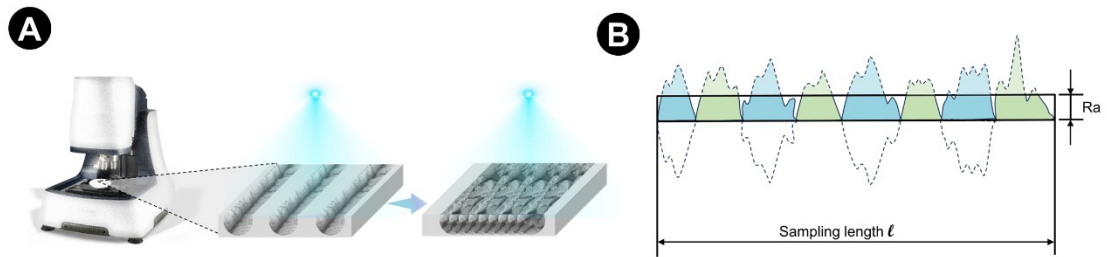

**Figure S2 Schematic of optical profilometer imaging and definition of surface roughness  $R_a$ .** From the measurement area of the optical profilometer, it can be seen that as the laser etching line increases, the roughness within the test area will increase gradually. Regarding  $R_a$ , the arithmetic mean roughness, it represents the average absolute value of roughness over a reference length. Originally, the blue region in the graph indicates areas below the mean line, but for the purpose of calculation, we take the absolute value of these deviations to determine  $R_a$ . This absolute value is relative to the average height of the surface. More accurately,  $R_a$  is the average deviation of the heights of each point on the surface from the mean height.

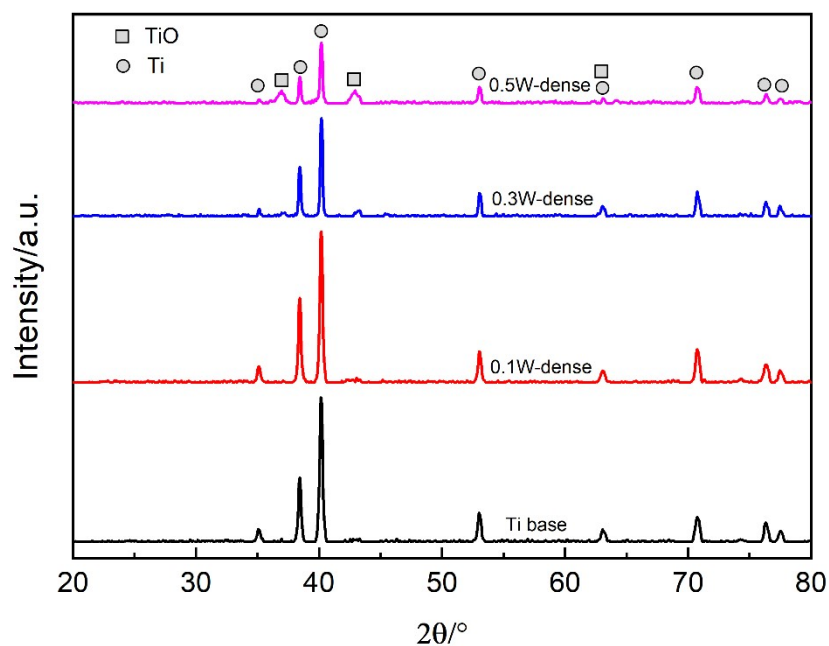

**Figure S3 XRD diagram of the Ti samples after modifications.**

## SI-2 Transfer of standard deviation

Add or subtract:  $(X \pm u_x) + (Y \pm u_y) = (X + Y) \pm \sqrt{u_x^2 + u_y^2}$

$$(X \pm u_x) - (Y \pm u_y) = (X - Y) \pm \sqrt{u_x^2 + u_y^2}$$

multiply or divide:  $(X \pm u_x)(Y \pm u_y) = XY \pm XY \sqrt{\left(\frac{u_x}{X}\right)^2 + \left(\frac{u_y}{Y}\right)^2}$

$$\frac{X \pm u_x}{Y \pm u_y} = \frac{X}{Y} \pm \frac{X}{Y} \sqrt{\left(\frac{u_x}{X}\right)^2 + \left(\frac{u_y}{Y}\right)^2}$$

where  $u_x$  and  $u_y$  represent the standard deviation of  $X$  and  $Y$ , respectively.

### SI-3 Calculation of nucleation site density

First, calculate the density of O and Ti atoms (/nm<sup>2</sup>) on the smooth surface according to [Table 2](#). It is known that the total density of Ti and oxygen atoms (Ti+O) on the surface is  $\rho(\text{Ti+O})=20.01 \pm 5.44/\text{nm}^2$ , and From, the percentages of O and Ti atoms are 31.16% and 9.51% shown in [Table 2](#), respectively. the density of O atoms and Ti atoms on the surface can be calculated:

$$\text{Density of O atoms: } \rho(\text{O}) = (20.01 \pm 5.44) \times 31.16\% = 6.24 \pm 1.70 / \text{nm}^2$$

$$\text{Density of Ti atoms: } \rho(\text{Ti}) = (20.01 \pm 5.44) \times 9.51\% = 1.90 \pm 0.52 / \text{nm}^2$$

[Table 3](#) shows that O atoms on the smooth surface come from two parts, namely TiO<sub>2</sub> and -OH, and TiO<sub>2</sub> accounted for 50.59%, -OH accounted for 49.41%, thus the densities of TiO<sub>2</sub> and -OH can be calculated respectively:

$$\text{Density of TiO}_2: \rho(\text{TiO}_2) = [(6.24 \pm 1.70) \times 50.59\%]/2 = 1.58 \pm 0.43/\text{nm}^2$$

$$\text{Density of -OH: } \rho(\text{-OH}) = (6.24 \pm 1.70) \times 49.41\% = 3.08 \pm 0.84/\text{nm}^2$$

The calculations for the other regions are shown below:

#### **0.1W-line**

$$\text{Density of O atoms: } \rho(\text{O}) = (20.01 \pm 5.44) \times 32.41\% = 6.49 \pm 1.76 / \text{nm}^2$$

$$\text{Density of Ti atoms: } \rho(\text{Ti}) = (20.01 \pm 5.44) \times 11.82\% = 2.37 \pm 0.64 / \text{nm}^2$$

$$\text{Density of TiO}_2: \rho(\text{TiO}_2) = [(6.49 \pm 1.76) \times 57.05\%]/2 = 1.85 \pm 0.50/\text{nm}^2$$

$$\text{Density of -OH: } \rho(\text{-OH}) = (6.49 \pm 1.76) \times 42.95\% = 2.79 \pm 0.76/\text{nm}^2$$

#### **0.1W-dense (0.1W-0.01)**

Density of O atoms:  $\rho(\text{O}) = (20.01 \pm 5.44) \times 35.74\% = 7.15 \pm 1.70 \text{ /nm}^2$

Density of Ti atoms:  $\rho(\text{Ti}) = (20.01 \pm 5.44) \times 14.63\% = 2.93 \pm 0.80 \text{ /nm}^2$

Density of  $\text{TiO}_2$ :  $\rho(\text{TiO}_2) = [(7.15 \pm 1.70) \times 65.06\%]/2 = 2.33 \pm 0.55 \text{ /nm}^2$

Density of -OH:  $\rho(-\text{OH}) = (7.15 \pm 1.70) \times 34.94\% = 2.50 \pm 0.59 \text{ /nm}^2$

### ***0.3W-line***

Density of O atoms:  $\rho(\text{O}) = (20.01 \pm 5.44) \times 46.20\% = 9.24 \pm 2.51 \text{ /nm}^2$

Density of Ti atoms:  $\rho(\text{Ti}) = (20.01 \pm 5.44) \times 18.46\% = 3.69 \pm 1.00 \text{ /nm}^2$

Density of  $\text{TiO}_2$ :  $\rho(\text{TiO}_2) = [(9.24 \pm 2.51) \times 75.53\%]/2 = 3.49 \pm 0.95 \text{ /nm}^2$

Density of -OH:  $\rho(-\text{OH}) = (9.24 \pm 2.51) \times 24.47\% = 2.26 \pm 0.61 \text{ /nm}^2$

### ***0.3W-dense (0.3W-0.01)***

Density of O atoms:  $\rho(\text{O}) = (20.01 \pm 5.44) \times 47.77\% = 9.56 \pm 2.60 \text{ /nm}^2$

Density of Ti atoms:  $\rho(\text{Ti}) = (20.01 \pm 5.44) \times 21.37\% = 4.28 \pm 1.16 \text{ /nm}^2$

Density of  $\text{TiO}_2$ :  $\rho(\text{TiO}_2) = [(9.56 \pm 2.60) \times 75.42\%]/2 = 3.61 \pm 0.98 \text{ /nm}^2$

Density of -OH:  $\rho(-\text{OH}) = (9.56 \pm 2.60) \times 24.58\% = 2.35 \pm 0.64 \text{ /nm}^2$

### ***0.5W-line***

Density of O atoms:  $\rho(\text{O}) = (20.01 \pm 5.44) \times 43.75\% = 8.75 \pm 2.38 \text{ /nm}^2$

Density of Ti atoms:  $\rho(\text{Ti}) = (20.01 \pm 5.44) \times 22.70\% = 4.54 \pm 1.23 \text{ /nm}^2$

Density of  $\text{TiO}_2$ :  $\rho(\text{TiO}_2) = [(8.75 \pm 2.38) \times 69.41\%]/2 = 3.04 \pm 0.83 \text{ /nm}^2$

Density of -OH:  $\rho(-\text{OH}) = (8.75 \pm 2.38) \times 30.59\% = 2.68 \pm 0.73 \text{ /nm}^2$

### ***0.5W-dense (0.5W-0.01)***

Density of O atoms:  $\rho(\text{O}) = (20.01 \pm 5.44) \times 45.23\% = 9.05 \pm 2.46 \text{ /nm}^2$

Density of Ti atoms:  $\rho(\text{Ti}) = (20.01 \pm 5.44) \times 24.68\% = 4.94 \pm 1.34 \text{ /nm}^2$

Density of  $\text{TiO}_2$ :  $\rho(\text{TiO}_2) = [(9.05 \pm 2.46) \times 64.69\%]/2 = 2.93 \pm 0.80 \text{ /nm}^2$

Density of -OH:  $\rho(-\text{OH}) = (9.05 \pm 2.46) \times 35.31\% = 3.20 \pm 0.87 \text{ /nm}^2$

## **References**

- [1] J.C. Phillips, R. Braun, W. Wang, J. Gumbart, E. Tajkhorshid, E. Villa, C. Chipot, R.D. Skeel, L. Kalé, K. Schulten, *J Comput Chem* 26 (2005) 1781–1802.
- [2] M. Matsui, M. Akaogi, *Mol Simul* 6 (1991) 239–244.
